# Supplementary material for: Reduced circulating dendritic cells in acute Plasmodium knowlesi and Plasmodium falciparum malaria despite elevated plasma Flt3 ligand levels
Source: Springer Nature journal article supplement (doi:10.1186/s12936-021-03642-0), 2021-02-16

***Plasmodium knowlesi* and *P. falciparum* malaria reduce circulating CD141 (BDCA-3), CD1c (BDCA-1) and plasmacytoid dendritic cells, and increase plasma Flt3 ligand.**

Jessica R. Loughland<sup>1,2\*</sup>, Tonia Woodberry<sup>2</sup>, Damian Oyong<sup>2</sup>, Kim A. Piera<sup>2</sup>, Fiona H. Amante<sup>1</sup>, Bridget E. Barber<sup>1,2,3</sup>, Matthew J. Grigg<sup>2,3</sup>, Timothy William<sup>3,4,5</sup>, Christian R. Engwerda<sup>1</sup>, Nicholas M. Anstey<sup>2,6</sup>, James S. McCarthy<sup>1</sup>, Michelle J Boyle<sup>1,2</sup>, Gabriela Minigo<sup>2,7\*</sup>

<sup>1</sup>QIMR Berghofer Medical Research Institute, Brisbane, Australia; <sup>2</sup>Menzies School of Health Research and Charles Darwin University, Darwin, Australia; <sup>3</sup>Gleneagles Hospital, Kota Kinabalu, Sabah, Malaysia; <sup>4</sup>Infectious Diseases Society Kota Kinabalu Sabah-Menzies School of Research Clinical Research Unit, Kota Kinabalu, Sabah, Malaysia; <sup>5</sup>Queen Elizabeth Hospital-Clinical Research Centre, Ministry of Health, Malaysia; <sup>6</sup>Royal Darwin Hospital, Darwin, Australia; <sup>7</sup>College of Health and Human Sciences, Charles Darwin University, Darwin, Australia.

**Supplementary Figure 1. No significant correlation between plasma Flt3L and peripheral blood pDC or CD1c<sup>+</sup> DC in induced blood-stage malaria.** Correlations of DC subset numbers and Flt3L concentration on day 0 (left plot), correlation of DC subset numbers and Flt3L concentration at peak infection (middle plot) and correlation of DC subset numbers at peak infection and Flt3L concentration at day 0 (right plot) for **A.** pDC (red) and **B.** CD1c<sup>+</sup> DCs (green) in volunteer infection studies. Spearman correlation was used and tests were two-tailed and considered significant if p-values <0.05.

**Supplementary Figure 2. No significant correlation between plasma Flt3L and parasitemia in acute clinical malaria.** Correlations between Flt3L concentration at acute infection and parasitemia (left plots), and correlations between Flt3L concentration at convalescence and parasitemia (right plots), for **A.** *P. falciparum* malaria and **B.** *P. knowlesi* malaria. Spearman correlation was used and tests were two-tailed and considered significant if p-values <0.05.

# Supplementary Figure 1

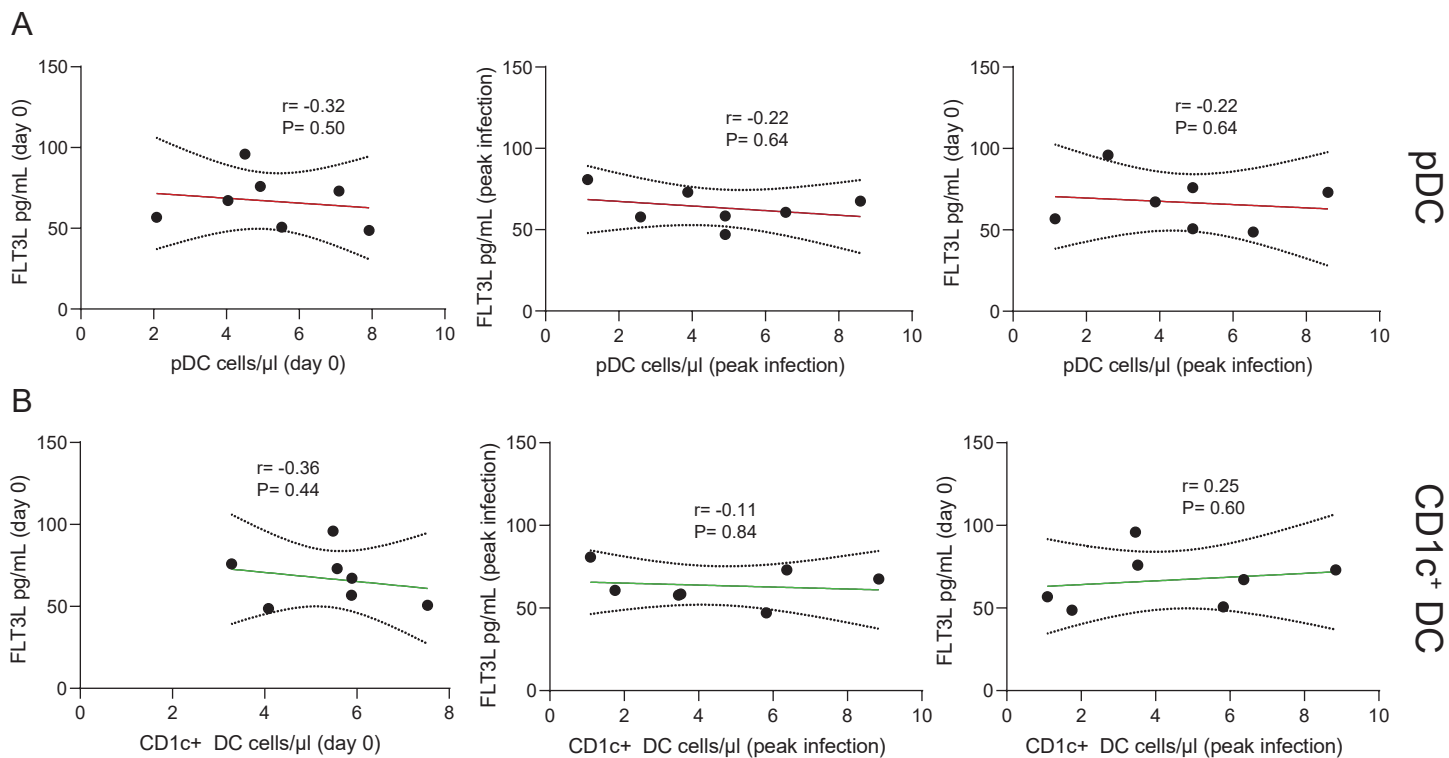

Supplementary Figure 2

A

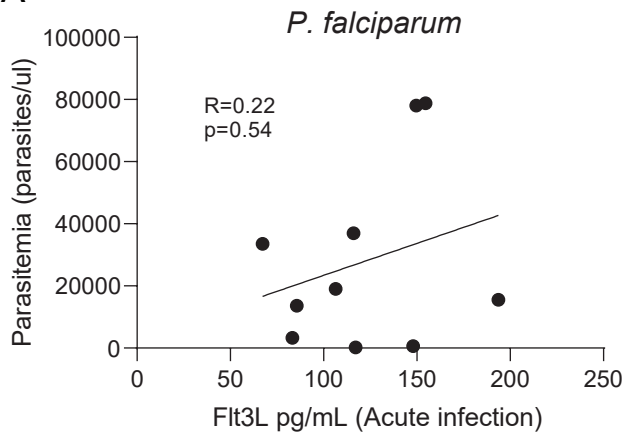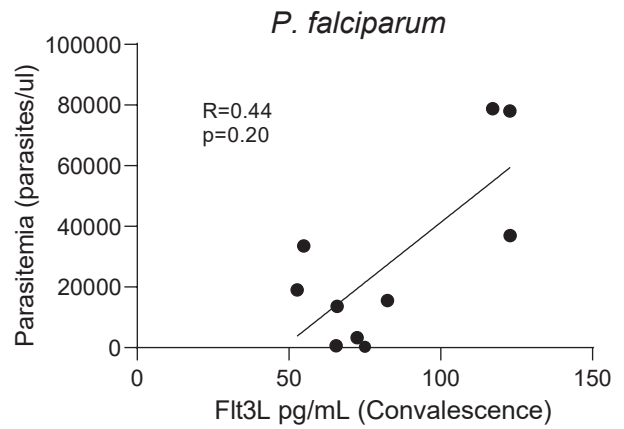

B

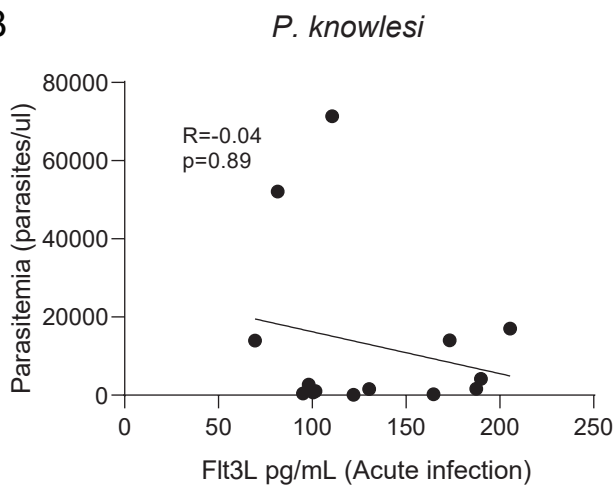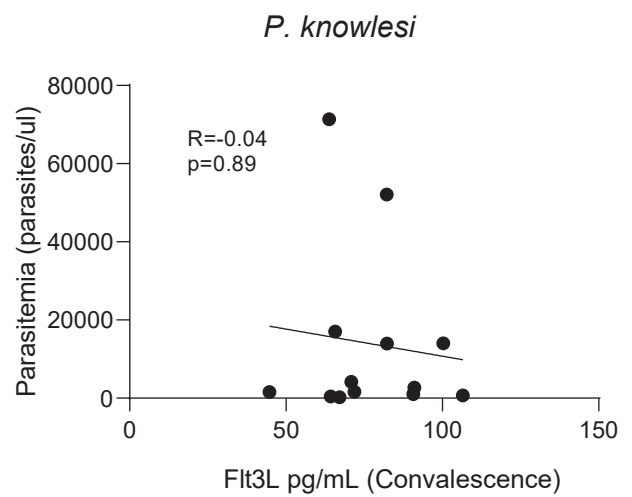

Supplement: MOESM1 [file 18865592]
